# Supplementary material for: An electrochemical DNA sensor based on polyaniline/graphene: high sensitivity to DNA sequences in a wide range
Source: Royal Society of Chemistry journal article supplement (doi:10.1039/c5an01088h), 2015-01-01
Supplement: c5an01088h1.pdf [file c5an01088h1.pdf]

**Supplementary Information**

**Electrochemical DNA sensor Based on Polyaniline/graphene:  
High Sensitivity to DNA Sequences in a Wide Range**

Qing Zheng<sup>†‡</sup>, Hao Wu<sup>†‡</sup>, Zongxu Shen<sup>†‡</sup>, Nan Wang<sup>†‡</sup>, Fang Qi<sup>†‡</sup>, Yuehui Ma<sup>§</sup>,  
Weijun Guang<sup>§</sup>, Rui Yan<sup>‡</sup>, Quangui Guo<sup>‡</sup>, Junzhong Wang<sup>‡\*</sup>, Yu Yu<sup>†</sup>, Kejian Ding<sup>†\*</sup>

<sup>†</sup>College of Life sciences and Bioengineering, Beijing Jiaotong University, Beijing  
100044, P R China

<sup>‡</sup>Key Laboratory of Carbon Materials, Institute of Coal Chemistry, Chinese Academy  
of Science, Taiyuan, 030001, P R China

<sup>§</sup> Institute of Animal Sciences, Chinese Academy of Agricultural Sciences, Beijing  
100083, P R China

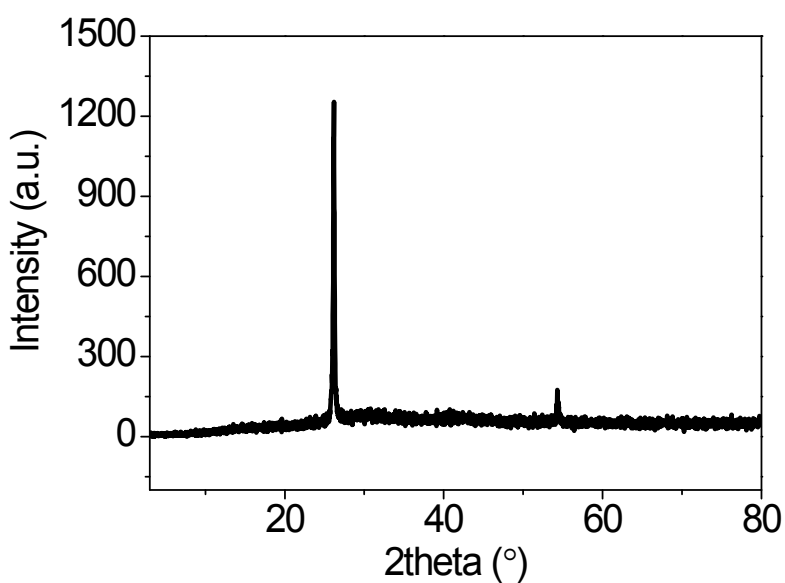

**Fig. S1.** XRD spectra of few-layer graphene.

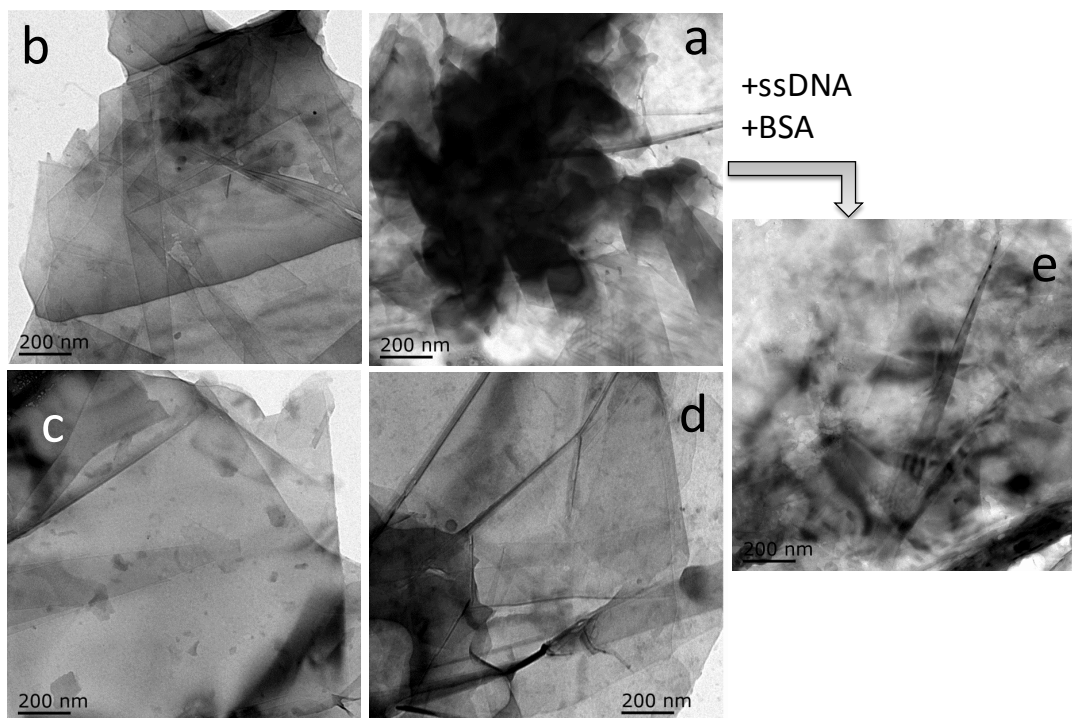

**Fig. S2.** The morphology of the hybrid of polyaniline and graphene. The mass proportions of polyaniline and graphene are 1:2 (a), 1:10 (b), 1:20 (c) and 1:100 (d), respectively. The morphology image of ssDNA and BSA modified electrode on sample a (e).

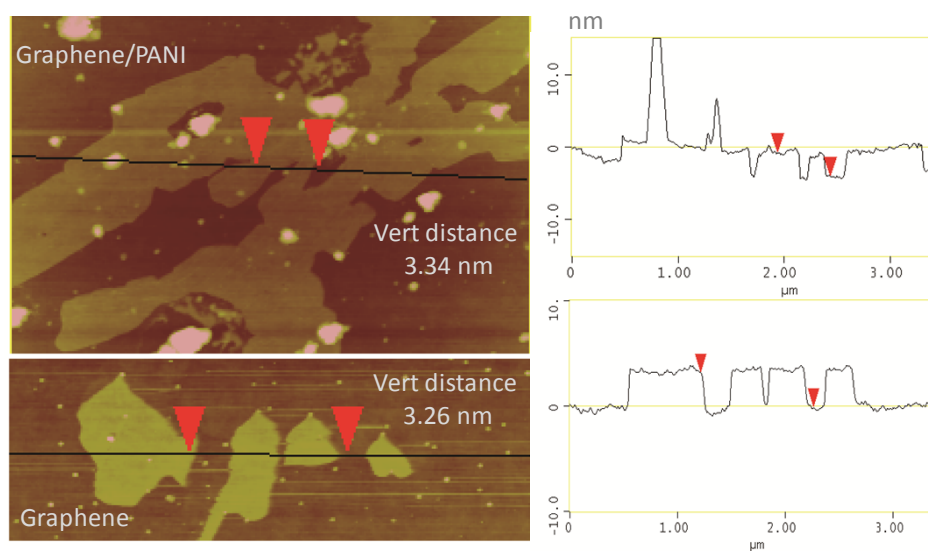

**Fig. S3.** AFM image and height profile of G/P and G.

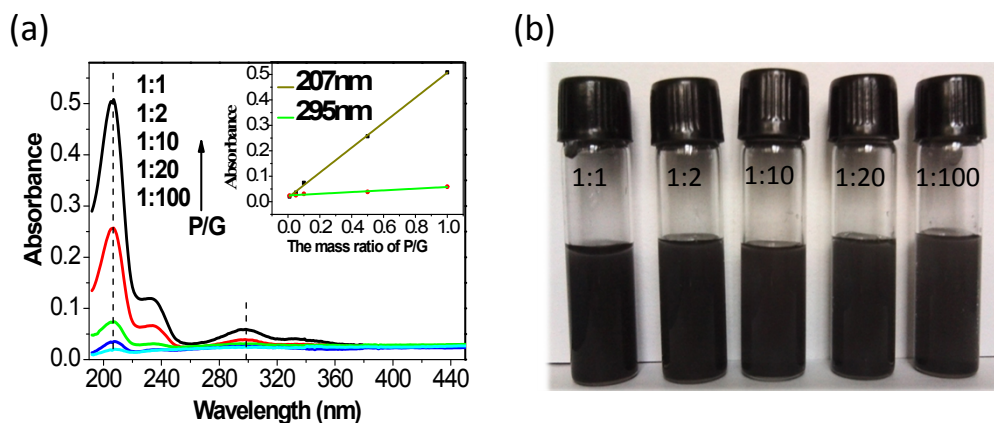

**Fig. S4.** (a) The UV-vis spectra of the hybrids of polyaniline/graphene at various ratios. The inset refers to the linear relationship of absorbance at the peak of 207 nm and 295 nm and the mass ratio of polyaniline/graphene. (b) The image of the samples before it was diluted.

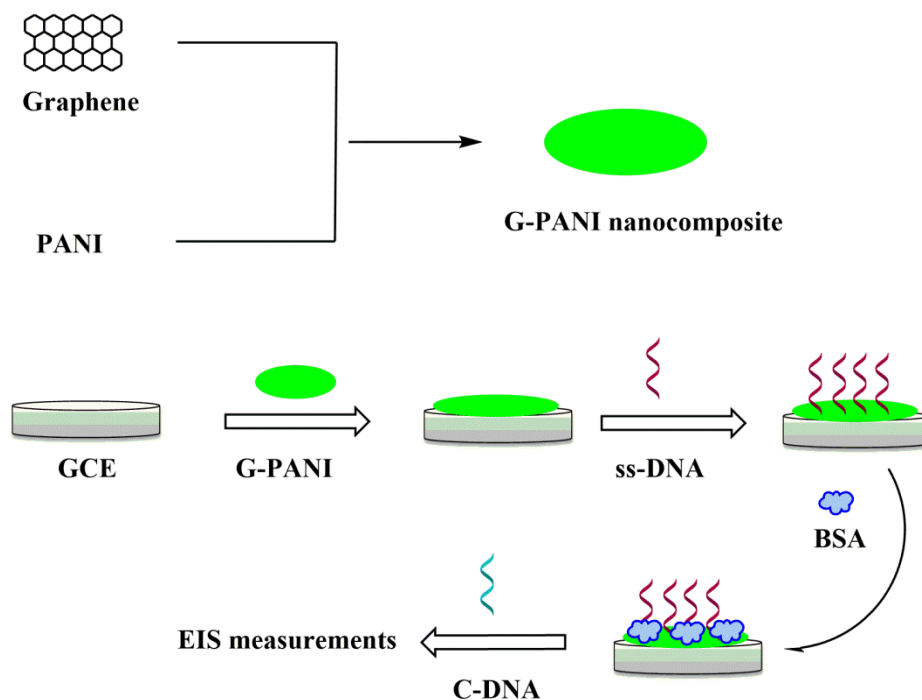

**Fig. S5.** Scheme for the synthesis procedures of the electrode

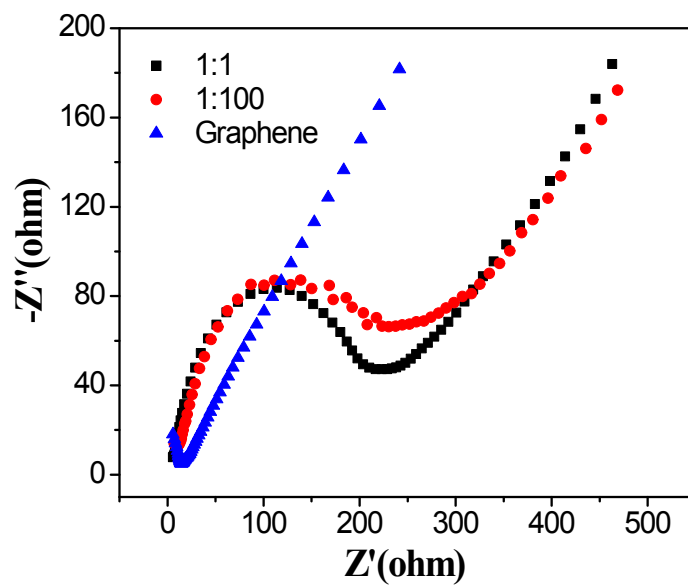

**Fig. S6.** Nyquist plots for P/G<sub>1:1</sub>, P/G<sub>1:100</sub>

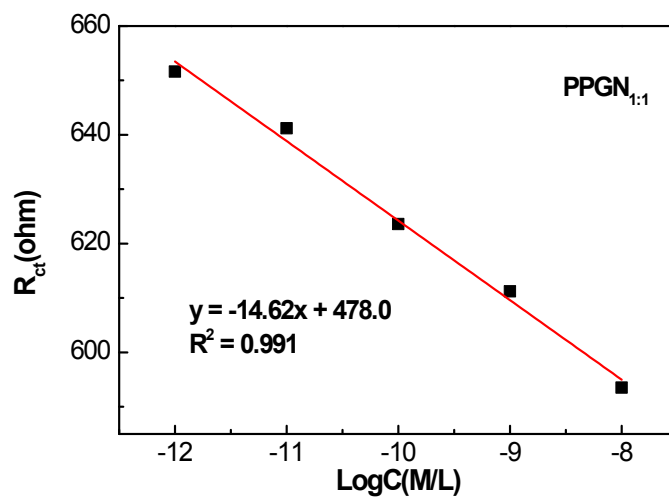

**Fig. S7.** The plot of  $\log C$  against the  $R_{ct}$  of the complementary DNA fragments (Without BSA self-assemble, PPGN<sub>1:1</sub> DNA sensor)

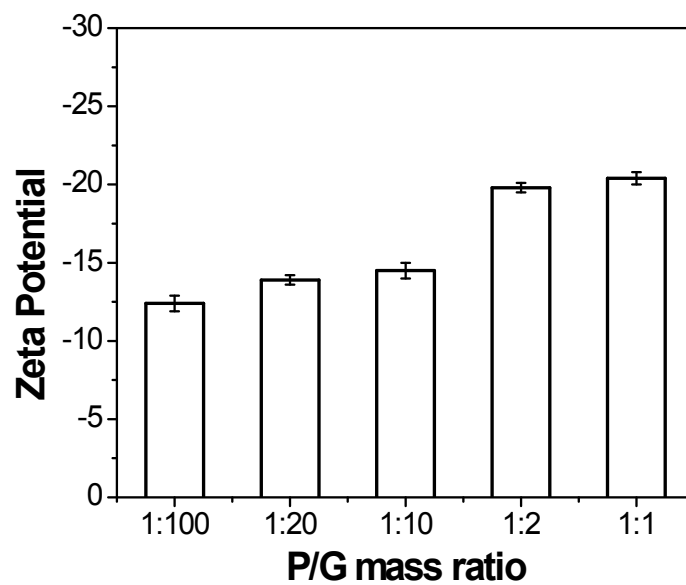

**Fig. S8.** The zeta potential of ss-DNA, BSA modified P/G composites. The mass proportions of polyaniline and graphene are, 1:100, 1:20, 1:10, 1:2 and 1:1, respectively.
